# Supplementary material for: Construction of a series of coordination polymers based on 1,4-naphthalenedicarboxylic and flexible dipyridyl ligands
Source: Royal Society of Chemistry journal article supplement (doi:10.1039/c3ce42148a), 2014-01-01
Supplement: c3ce42148a.pdf [file c3ce42148a.pdf]

## **Electronic Supplementary Information (ESI)**

### **Construction of a series of coordination polymers based on 1,4-naphthalenedicarboxylic and flexible dipyriddy ligands**

Ni-Ya Li, Yu Ge, Tao Wang, Shu-Jun Wang, Xue-Ying Ji and Dong Liu\*

*College of Chemistry and Materials Science, Huaibei Normal University, Huaibei  
235000, P. R. China*

\*E-mail: dongliu@chnu.edu.cn

## Table of Contents

|                                                                                                                                                                           |    |
|---------------------------------------------------------------------------------------------------------------------------------------------------------------------------|----|
| <b>Table S1</b> Selected Bond Lengths (Å) and Angles (°) for <b>1-6</b> .....                                                                                             | S3 |
| <b>Fig. S1</b> Experimental (red) and simulated (black) PXRD patterns for <b>1</b> (a); <b>2</b> (b); <b>3</b> (c);<br><b>4</b> (d); <b>5</b> (e) and <b>6</b> (f). ..... | S6 |
| <b>Fig. S2</b> The TGA curves for <b>1-6</b> . .....                                                                                                                      | S8 |

**Table S1. Selected Bond Lengths (Å) and Angles (°) for 1-6**

| Compound 1        |            |                   |            |
|-------------------|------------|-------------------|------------|
| Ag(1)-N(2A)       | 2.215(2)   | Ag(1)-N(1)        | 2.227(3)   |
| N(2A)-Ag(1)-N(1)  | 160.63(10) |                   |            |
| Compound 2        |            |                   |            |
| Ag(1)-N(1)        | 2.1526(17) | Ag(1)-N(2A)       | 2.1616(18) |
| N(1)-Ag(1)-N(2A)  | 168.16(7)  |                   |            |
| Compound 3        |            |                   |            |
| Cd(1)-O(4A)       | 2.1880(19) | Cd(1)-O(1)        | 2.2905(19) |
| Cd(1)-O(3B)       | 2.320(2)   | Cd(1)-N(1)        | 2.341(2)   |
| Cd(1)-O(1C)       | 2.486(2)   | Cd(1)-O(2)        | 2.544(2)   |
| O(4A)-Cd(1)-O(1)  | 176.08(7)  | O(4A)-Cd(1)-O(3B) | 83.15(9)   |
| O(1)-Cd(1)-O(3B)  | 98.36(8)   | O(4A)-Cd(1)-N(1)  | 85.12(8)   |
| O(1)-Cd(1)-N(1)   | 92.33(8)   | O(3B)-Cd(1)-N(1)  | 158.85(8)  |
| O(4A)-Cd(1)-O(1C) | 102.18(8)  | O(1)-Cd(1)-O(1C)  | 74.53(7)   |
| O(3B)-Cd(1)-O(1C) | 81.94(7)   | N(1)-Cd(1)-O(1C)  | 83.42(8)   |
| O(4A)-Cd(1)-O(2)  | 129.97(7)  | O(1)-Cd(1)-O(2)   | 53.94(7)   |
| O(3B)-Cd(1)-O(2)  | 78.87(8)   | N(1)-Cd(1)-O(2)   | 121.92(8)  |
| O(1C)-Cd(1)-O(2)  | 120.63(6)  |                   |            |
| Compound 4        |            |                   |            |
| Cd(1)-O(4A)       | 2.217(2)   | Cd(1)-O(3B)       | 2.260(2)   |
| Cd(1)-N(1)        | 2.305(2)   | Cd(1)-O(1C)       | 2.319(2)   |
| Cd(1)-O(2)        | 2.355(2)   | Cd(1)-O(1)        | 2.497(2)   |
| O(4A)-Cd(1)-O(3B) | 82.40(9)   | O(4A)-Cd(1)-N(1)  | 84.66(9)   |
| O(3B)-Cd(1)-N(1)  | 165.59(9)  | O(4)-Cd(1)-O(1C)  | 109.18(9)  |

|                   |            |                  |           |
|-------------------|------------|------------------|-----------|
| O(3B)-Cd(1)-O(1C) | 81.90(9)   | N(1)-Cd(1)-O(1C) | 96.46(9)  |
| O(4A)-Cd(1)-O(2)  | 133.46(9)  | O(3B)-Cd(1)-O(2) | 87.13(10) |
| N(1)-Cd(1)-O(2)   | 106.46(10) | O(1C)-Cd(1)-O(2) | 114.00(8) |
| O(4A)-Cd(1)-O(1)  | 171.06(8)  | O(3B)-Cd(1)-O(1) | 104.98(8) |
| N(1)-Cd(1)-O(1)   | 87.41(8)   | O(1C)-Cd(1)-O(1) | 67.62(9)  |
| O(2)-Cd(1)-O(1)   | 53.18(8)   |                  |           |

Compound 5

|                   |            |                   |            |
|-------------------|------------|-------------------|------------|
| Zn(1)-O(2A)       | 2.025(5)   | Zn(1)-O(2B)       | 2.025(5)   |
| Zn(1)-N(1)        | 2.027(5)   | Zn(1)-O(1)        | 2.057(5)   |
| Zn(1)-O(1C)       | 2.057(5)   |                   |            |
| O(2A)-Zn(1)-O(2B) | 93.4(4)    | O(2A)-Zn(1)-N(1)  | 104.01(19) |
| O(2B)-Zn(1)-N(1)  | 104.01(19) | O(2A)-Zn(1)-O(1)  | 158.6(2)   |
| O(2B)-Zn(1)-O(1)  | 84.7(3)    | N(1)-Zn(1)-O(1)   | 97.12(17)  |
| O(2A)-Zn(1)-O(1C) | 84.7(3)    | O(2B)-Zn(1)-O(1C) | 158.6(2)   |
| N(1)-Zn(1)-O(1C)  | 97.12(17)  | O(1)-Zn(1)-O(1C)  | 89.3(3)    |

Compound 6

|                   |            |                  |            |
|-------------------|------------|------------------|------------|
| Co(1)-O(6)        | 2.0077(17) | Co(1)-O(9)       | 2.0164(16) |
| Co(1)-O(3A)       | 2.0348(17) | Co(1)-O(1)       | 2.0855(16) |
| Co(1)-N(1)        | 2.194(2)   | Co(2)-O(2)       | 2.0489(16) |
| Co(2)-O(8B)       | 2.0976(16) | Co(2)-N(2C)      | 2.115(2)   |
| Co(2)-O(5)        | 2.1172(17) | Co(2)-O(9)       | 2.1532(15) |
| Co(2)-O(4D)       | 2.2055(18) |                  |            |
| O(6)-Co(1)-O(9)   | 102.30(7)  | O(6)-Co(1)-O(3A) | 102.13(7)  |
| O(9)-Co(1)-O(3A)  | 154.80(7)  | O(6)-Co(1)-O(1)  | 93.31(7)   |
| O(9)-Co(1)-O(1)   | 92.78(7)   | O(3A)-Co(1)-O(1) | 91.89(7)   |
| O(6)-Co(1)-N(1)   | 89.59(8)   | O(9)-Co(1)-N(1)  | 90.17(7)   |
| O(3A)-Co(1)-N(1)  | 83.92(8)   | O(1)-Co(1)-N(1)  | 175.33(7)  |
| O(2)-Co(2)-O(8B)  | 172.50(7)  | O(2)-Co(2)-N(2C) | 87.08(7)   |
| O(8B)-Co(2)-N(2C) | 90.12(7)   | O(2)-Co(2)-O(5)  | 85.56(7)   |

|                   |           |                   |           |
|-------------------|-----------|-------------------|-----------|
| O(8B)-Co(2)-O(5)  | 87.69(7)  | N(2C)-Co(2)-O(5)  | 93.91(7)  |
| O(2)-Co(2)-O(9)   | 96.58(6)  | O(8B)-Co(2)-O(9)  | 87.10(6)  |
| N(2C)-Co(2)-O(9)  | 171.83(7) | O(5)-Co(2)-O(9)   | 93.66(6)  |
| O(2)-Co(2)-O(4D)  | 84.70(7)  | O(8B)-Co(2)-O(4D) | 102.36(7) |
| N(2C)-Co(2)-O(4D) | 92.02(7)  | O(5)-Co(2)-O(4D)  | 168.33(6) |
| O(9)-Co(2)-O(4D)  | 81.09(6)  |                   |           |

---

Symmetry codes: for **1**: (A)  $x, y - 1, z - 1$ ; for **2**: (B)  $x + 1, -y + 1/2, z + 1/2$ ; for **3**: (A)  $x - 1/2, y - 1/2, z$ ; (B)  $-x - 1/2, y - 1/2, -z + 1/2$ ; (C)  $-x - 1, -y, -z$ ; for **4**: (A)  $x - 1/2, y - 1/2, z$ ; (B)  $-x + 5/2, y - 1/2, -z + 3/2$ ; (C)  $-x + 2, -y - 1, -z + 1$ ; for **5**: (A)  $-x, -y + 1, -z + 1$ ; (B)  $x, -y + 1, -z + 1$ ; (C)  $-x, y, z$ ; for **6**: (A)  $x - 1/2, -y + 1/2, -z$ ; (B)  $-x, y + 1/2, -z + 1/2$ ; (C)  $x + 1, y, z$ ; (D)  $-x + 1/2, y + 1/2, z$ .

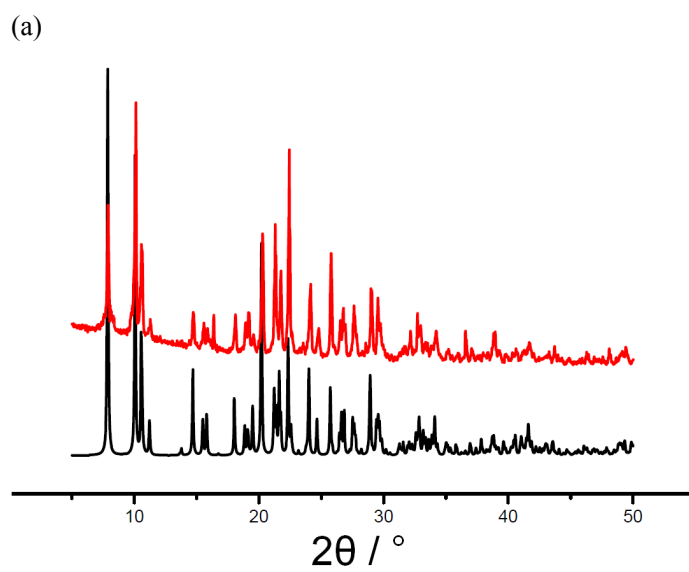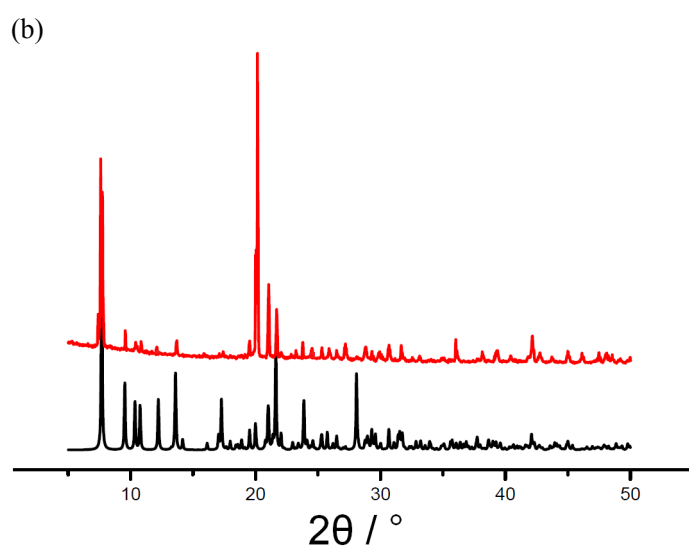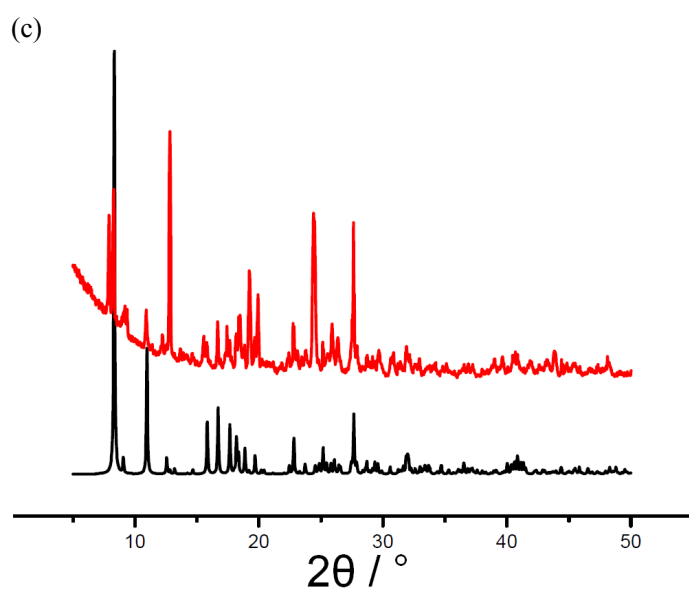

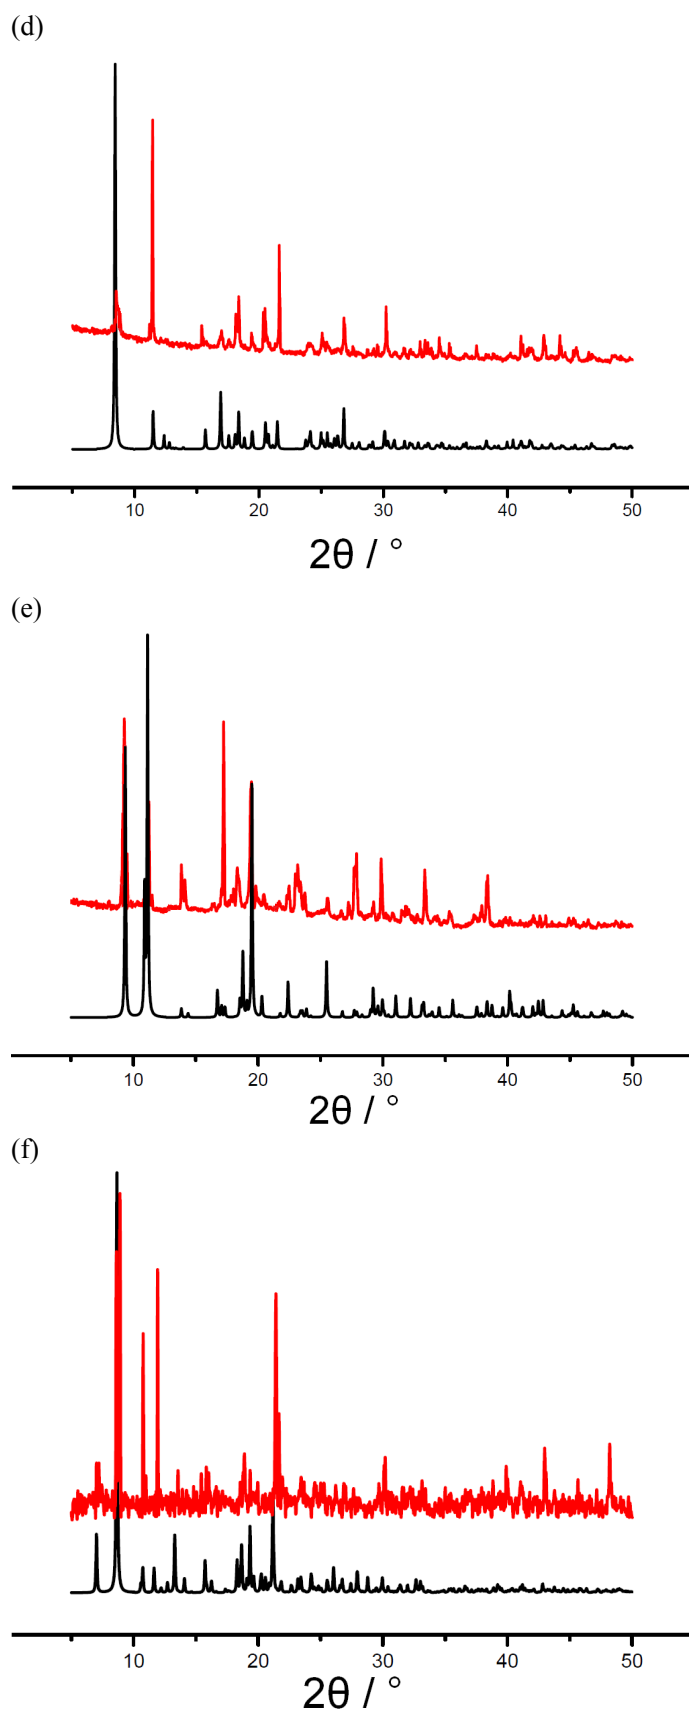

**Fig. S1** Experimental (red) and simulated (black) PXR D patterns for **1** (a); **2** (b); **3** (c); **4** (d); **5**(e) and **6**(f).

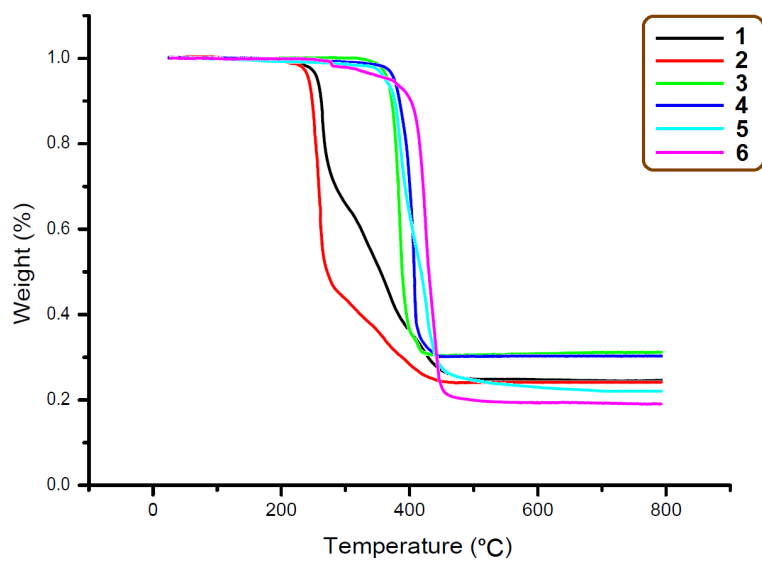

**Fig. S2** The TG curves for 1-6.
